# Supplementary material for: The Activity of Chelidonium majus L. Latex and Its Components on HPV Reveal Insights into the Antiviral Molecular Mechanism
Source: MDPI journal article supplement (doi:10.3390/ijms23169241), 2022-08-17
Supplement: s1 [file s1]

## Supplementary Materials

### Insights into the molecular mechanism behind *C. majus* latex antiviral properties. The activity of crude latex and its components on different stages of HPV infection.

Oskar Musidlak, Alicja Warowicka, Justyna Broniarczyk, Damian Adamczyk, Anna Goździcka-Józefiak and Robert Nawrot

Department of Molecular Virology, Institute of Experimental Biology, Faculty of Biology, Adam Mickiewicz University in Poznan, Uniwersytetu Poznanskiego 6, 61-614 Poznan, Poland;

#### 1. *The verification of latex fraction composition*

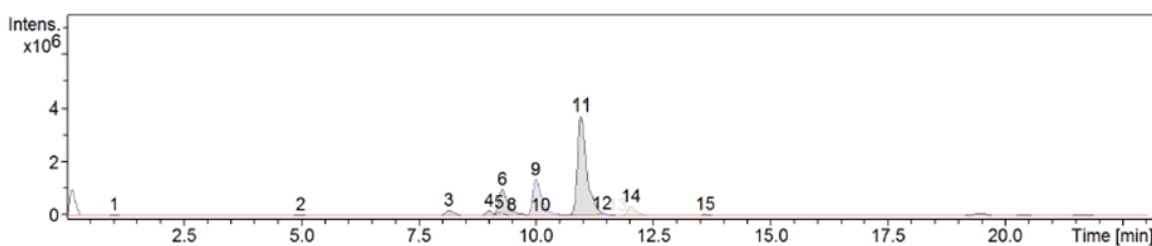

**Figure S1.** The total ion chromatogram and ESI mass spectra, taken from the RT range 1.0-13.6 min. Numbers 1-15 correspond to identified alkaloids in *C. majus* alkaloid-rich fraction (S3), depicted in Table S1.

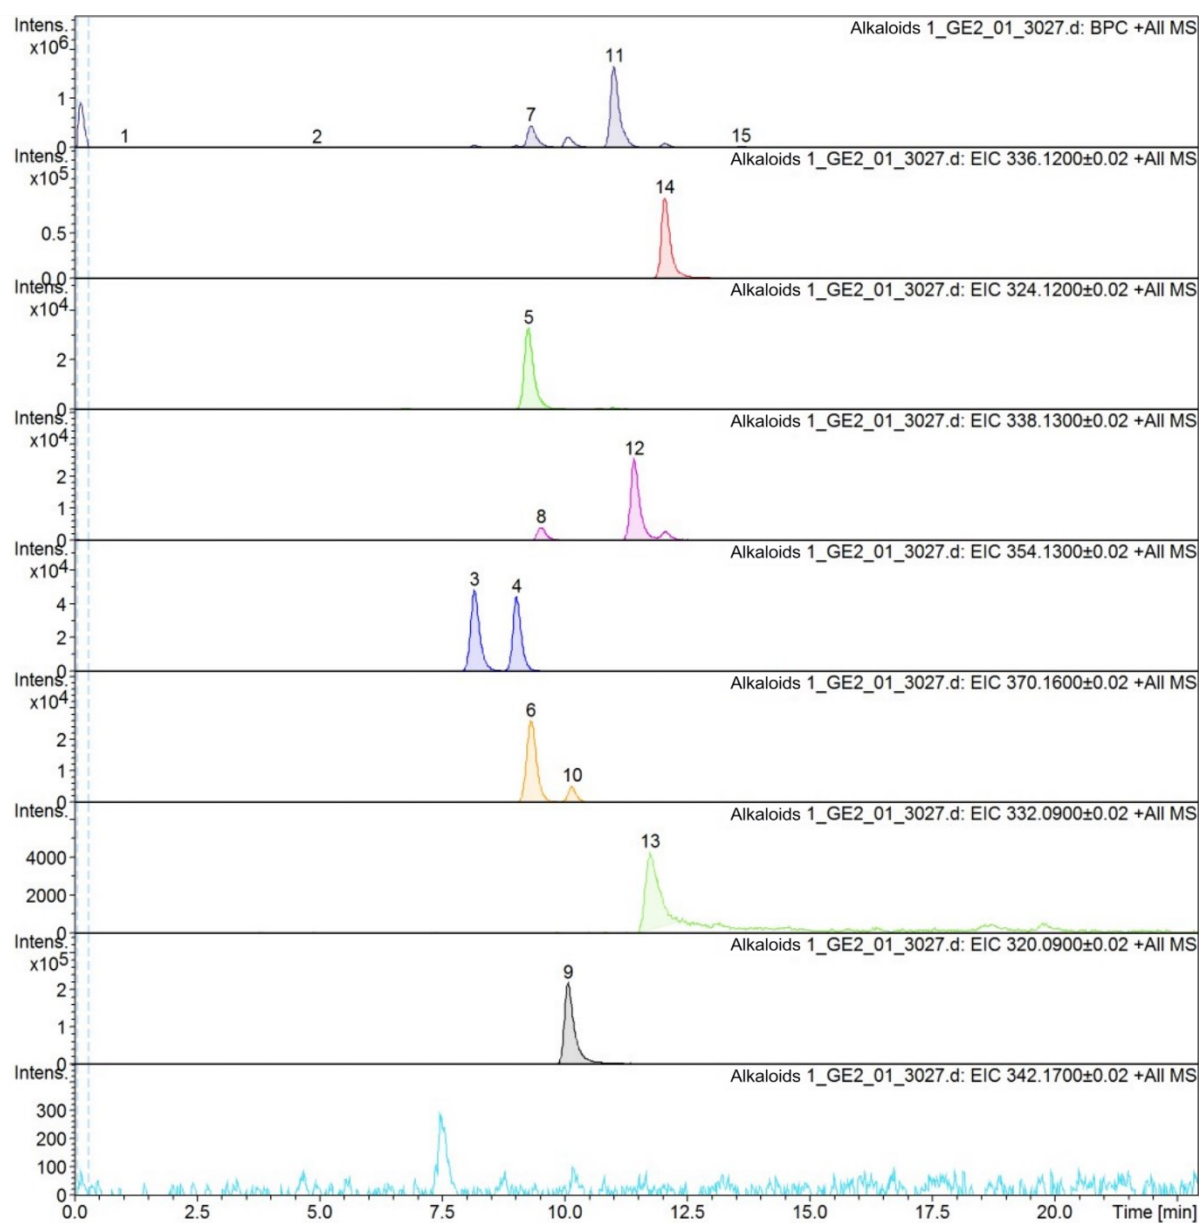

**Figure S2.** Extracted ion chromatograms list from HPLC-MS analysis of *C. majus* latex alkaloid-rich fraction. Numbers 1-15 correspond to identified alkaloids in *C. majus* alkaloid-rich fraction (S3), depicted in Table S1.

**Table S1.** Alkaloids identified by mass spectrometry in the *C. majus* latex alkaloid-rich fraction (S3).

| No.  | RT        | [M] <sup>+</sup> or [M+H] <sup>+</sup> | Identification results | Alkaloid fraction (#1) | Alkaloid fraction (#2) |
|------|-----------|----------------------------------------|------------------------|------------------------|------------------------|
|      | [min]     | m/z                                    |                        | % (semi-quantitative)  |                        |
| 1    | 1.0       | 115.0364                               | unknown                | 0.34                   | 0.39                   |
| 2    | 4.9 – 5.0 | 350.1020                               | unknown                | 0.07                   | 0.38                   |
| 3    | 8.2       | 354.1335                               | protopine              | 1.81                   | 2.48                   |
| 4    | 9.0       | 354.1224                               | chelidone              | 1.57                   | 1.94                   |
| 5    | 9.3       | 324.1229                               | stylopine              | 1.35                   | 1.40                   |
| 6    | 9.3       | 370.1649                               | allocryptopine isomer  | 1.13                   | 1.37                   |
| 7    | 9.3       | 322.1071                               | unknown                | 17.83                  | 13.55                  |
| 8    | 9.5       | 338.1379                               | jatrorrhizine/isomer   | 0.16                   | 0.19                   |
| 9    | 10.1      | 320.0912                               | coptisine              | 9.30                   | 18.94                  |
| 10   | 10.1      | 370.1649                               | allocryptopine         | 0.18                   | 0.19                   |
| 11   | 11.0      | 380.1493                               | unknown                |                        |                        |
| 12   | 11.4      | 338.1383                               | dihydroberberine       | 0.98                   | 0.92                   |
| 13   | 11.7      | 332.0923                               | sanguinarine           | 0.23                   | 0.25                   |
| 14   | 12.0      | 336.1225                               | berberine              | 3.43                   | 4.42                   |
| 15   | 13.6      | 348.1228                               | chelerythrine          | 0.82                   | 0.38                   |
| n.a. | 0.1       | 226.9517                               | - (solvents+additives) |                        |                        |

RT – retention time; [M]<sup>+</sup> or [M+H]<sup>+</sup> - molecular ions; % - percentage content of alkaloids. Semi-quantitative analysis was performed in duplicate (#1, #2).

**Table S2.** Proteins identified by mass spectrometry in the *C. majus* latex protein fraction (S2). The table shows the results with score above 200 and arranged according to the decreasing score.

| Accession No. <sup>a)</sup> | Identification results                 | Score <sup>b)</sup> | MW [Da] <sup>c)</sup> | Peptide count <sup>d)</sup> | Sequence coverage <sup>e)</sup> | emPAI <sup>f)</sup> |
|-----------------------------|----------------------------------------|---------------------|-----------------------|-----------------------------|---------------------------------|---------------------|
| m.61435                     | ubiquitin-nedd8-like protein rub1-like | 4975                | 17103                 | 9                           | 54                              | 10,32               |
| m.60893                     | polyphenol oxidase                     | 2703                | 66876                 | 22                          | 37                              | 4,16                |
| m.7838                      | reticuline oxidase-like                | 2452                | 62494                 | 24                          | 48                              | 7,1                 |
| uniq_01326                  | superoxide dismutase                   | 1764                | 15292                 | 7                           | 42                              | 5,62                |
| m.2906                      | polyphenol chloroplastic-like          | 1181                | 67955                 | 18                          | 37                              | 2,46                |
| m.54853                     | beta-amylase precursor                 | 1167                | 57143                 | 11                          | 26                              | 2,02                |
| m.60799                     | lactoylglutathione lyase-like          | 1055                | 38664                 | 12                          | 34                              | 4,7                 |
| m.60938                     | phospholipase d alpha 1-like           | 814                 | 92993                 | 18                          | 32                              | 1,48                |
| m.44308                     | reticuline oxidase-like                | 652                 | 59389                 | 6                           | 12                              | 0,76                |
| m.62963                     | polyphenol chloroplastic-like          | 590                 | 57726                 | 8                           | 20                              | 1,08                |
| m.61212                     | malate mitochondrial-like              | 530                 | 37227                 | 8                           | 28                              | 1,47                |

|            |                                                            |     |       |    |    |       |
|------------|------------------------------------------------------------|-----|-------|----|----|-------|
| m.61052    | superoxide<br>dismutase                                    | 507 | 21484 | 5  | 35 | 1,63  |
| m.44293    | reticuline oxidase                                         | 471 | 43115 | 6  | 16 | 1,18  |
| m.37901    | mlp-like protein 28                                        | 426 | 41201 | 10 | 25 | 2,07  |
| m.37898    | mlp-like protein 28                                        | 415 | 39557 | 8  | 23 | 1,6   |
| m.2548     | enolase-like                                               | 412 | 47955 | 6  | 18 | 0,69  |
| m.24014    | calmodulin-like<br>isoform 1                               | 391 | 16883 | 8  | 53 | 10,68 |
| m.60753    | calmodulin-related<br>protein isoform 1                    | 390 | 24274 | 9  | 55 | 5,62  |
| m.7868     | m.7868 peroxidase<br>12-like                               | 388 | 25142 | 7  | 32 | 2,19  |
| m.16756    | phosphoglycerate<br>cytosolic-like                         | 380 | 42300 | 10 | 35 | 1,7   |
| m.60989    | protein disulfide-<br>isomerase-like                       | 370 | 56569 | 10 | 22 | 1,11  |
| m.2283     | acid beta-<br>fructofuranosidase-<br>like                  | 369 | 58014 | 5  | 14 | 0,44  |
| m.12634    | mlp-like protein 28                                        | 340 | 21820 | 8  | 41 | 3,6   |
| m.14064    | protein in2-1<br>homolog b-like                            | 340 | 33956 | 6  | 31 | 1,1   |
| m.62107    | malate chloroplastic-<br>like                              | 338 | 43545 | 6  | 18 | 0,79  |
| m.43933    | atp synthase subunit<br>mitochondrial-like                 | 336 | 59908 | 7  | 17 | 0,64  |
| m.60714    | glyceraldehyde-3-<br>phosphate cytosolic-<br>like          | 314 | 36928 | 5  | 16 | 0,76  |
| m.17988    | glyceraldehyde-3-<br>phosphate cytosolic-<br>like          | 309 | 46280 | 9  | 33 | 1,27  |
| m.2644     | polyphenol oxidase                                         | 308 | 49158 | 5  | 10 | 0,67  |
| m.61561    | DNA repair protein<br>rad23-3                              | 291 | 41475 | 6  | 19 | 1,03  |
| m.3150     | minor allergen alt                                         | 284 | 21592 | 5  | 32 | 1,62  |
| m.2591     | monodehydroascorbic<br>acid reductase-like                 | 281 | 35425 | 6  | 19 | 1,04  |
| m.16751    | desiccation<br>protectant protein<br>lea14 homolog         | 279 | 19103 | 5  | 31 | 1,97  |
| m.2541     | anthocyanidin -o-<br>glucosyltransferase-<br>like          | 274 | 49082 | 9  | 22 | 1,16  |
| m.59541    | protein disulfide<br>isomerase-like 1-4-<br>like isoform 1 | 266 | 65116 | 7  | 12 | 0,57  |
| uniq_02123 | s-norcochlorogenic<br>acid synthase-like                   | 265 | 18108 | 6  | 55 | 2,96  |

|            |                                                      |     |       |   |    |      |
|------------|------------------------------------------------------|-----|-------|---|----|------|
| m.11641    | stromal 70 kda heat shock-related chloroplastic-like | 262 | 76045 | 7 | 11 | 0,48 |
| m.61381    | glutathione cytosolic-like                           | 241 | 54377 | 6 | 16 | 0,59 |
| m.60932    | luminal-binding protein 5-like                       | 238 | 73905 | 7 | 12 | 0,49 |
| m.60758    | malate cytoplasmic-like                              | 238 | 41542 | 4 | 12 | 0,66 |
| uniq_03599 | probable calcium-binding protein cml13-like          | 229 | 16548 | 5 | 38 | 3,5  |
| m.2578     | peroxidase 12-like                                   | 227 | 39347 | 7 | 19 | 1,35 |
| m.61081    | multi-protein-bridging factor 1b-like                | 218 | 15623 | 5 | 35 | 2,75 |
| m.61661    | heat shock 70 kda mitochondrial-like                 | 207 | 72835 | 5 | 9  | 0,48 |
| m.33249    | ribulose-phosphate 3-cytoplasmic isoform-like        | 205 | 24303 | 3 | 16 | 0,99 |
| m.12629    | mlp-like protein 34                                  | 203 | 11788 | 5 | 42 | 7,12 |

a) Accession numbers of the annotated transcript database of *C. majus* (version 2 Chmajus2015.01.06) with added cRAP nucleotide sequences (common Random Protein Repository). The Searchable *Chelidonium majus* coding sequences (CDS) database is provided on IPK Gatersleben ViroBLAST server at: <http://webblast.ipk-gatersleben.de/chelidonium/>

b) Mascot Search Probability Based Mowse Score. Ions score is  $-10 \cdot \log(P)$ , where P is the probability that the observed match is a random event. Score values of individual ions greater than 48 indicate the identity or very high homology of the match between the experimental data and the database sequence ( $P < 0.05$ ).

c) Theoretical molecular weights (kDa) of the identified proteins.

d) Number of "matching" peptides identified by searching databases with the MASCOT algorithm.

e) The degree of coverage of the amino acid sequences of the identified proteins

f) Exponentially modified protein abundance index of identified protein according to Mascot Search data emPAI % — proportion of emPAI values in each category to the sum total of emPAI values for each sample (relative abundance).

## 2. *In silico docking of selected C. majus latex alkaloids to p53 protein*

The identified coordinates (x, y, z) of active sites were used for the docking of ligands (berberine, dihydroberberine and coptisine) to p53. The first active pocket was identified by 6 predictors and is the highest-rated active site in the p53 protein (Table S3).

**Table S3.** Identification of coordinates (x, y, z) of p53 active sites.

| Active site No. | x      | y      | z     | Number of predictors | z-score |
|-----------------|--------|--------|-------|----------------------|---------|
| 1               | -2.082 | 1.907  | 7.032 | 6                    | 16.08   |
| 2               | 3.406  | -7.713 | 3.014 | 1                    | 3.43    |
| 3               | 14.191 | -2.847 | 4.276 | 2                    | 2.80    |

MetaPocket software also determined the amino acid residues within the active pocket. These are the rest that can potentially bind to ligand molecules. The list of amino acid residues making up the active pockets is provided in Table S4.

**Table S4.** Amino acid residues identified in active sites of p53.

| Active site 1 |            |            |            |            |            |            |            |            |            |
|---------------|------------|------------|------------|------------|------------|------------|------------|------------|------------|
| GLU_A^349^    | ARG_B^333^ | ARG_B^337^ | ASP_A^352^ | GLY_B^334^ | ARG_B^335^ | GLU_B^336^ | GLU_B^339^ | MET_B^340^ | GLU_B^343^ |
| GLU_D^336^    | LEU_A^348^ | ARG_B^342^ | LYS_C^351^ | ARG_D^337^ | MET_D^340^ | LEU_B^344^ | LEU_C^348^ | ALA_A^353^ | LYS_A^351^ |
| LEU_A^350^    | ALA_A^355^ | ALA_A^347^ | GLU_D^339^ | GLU_D^343^ | ARG_D^335^ | GLY_D^334^ | ARG_D^342^ | LEU_A^344^ | LEU_D^344^ |
| GLU_A^343^    | ALA_D^347^ | LEU_D^348^ | GLU_D^346^ |            |            |            |            |            |            |
| Active site 2 |            |            |            |            |            |            |            |            |            |
| GLN_A^354^    | ALA_A^355^ | LYS_A^351^ | LEU_D^350^ | GLU_D^343^ | GLU_D^346^ | ALA_D^347^ | ALA_A^347^ | LEU_A^348^ | LEU_A^350^ |
| GLN_D^354^    | GLU_A^346^ | LYS_D^351^ | ALA_D^353^ | MET_B^340^ | GLU_D^339^ | MET_D^340^ | LEU_A^344^ | LEU_D^344^ | GLU_A^339^ |
| MET_A^340^    | GLU_A^343^ | MET_C^340^ | ARG_C^337^ | LEU_D^348^ | GLU_A^336^ | GLU_C^343^ | GLU_C^336^ | ARG_A^335^ | ARG_A^337^ |
| GLU_C^339^    | ARG_A^342^ |            |            |            |            |            |            |            |            |
| Active site 3 |            |            |            |            |            |            |            |            |            |
| ASP_C^352^    | ARG_D^333^ | ASN_C^345^ | LEU_C^348^ | GLU_C^349^ | ILE_D^332^ | GLY_D^334^ | GLN_D^331^ | LYS_C^351^ | GLN_C^331^ |
| ASN_D^345^    | GLU_D^349^ |            |            |            |            |            |            |            |            |

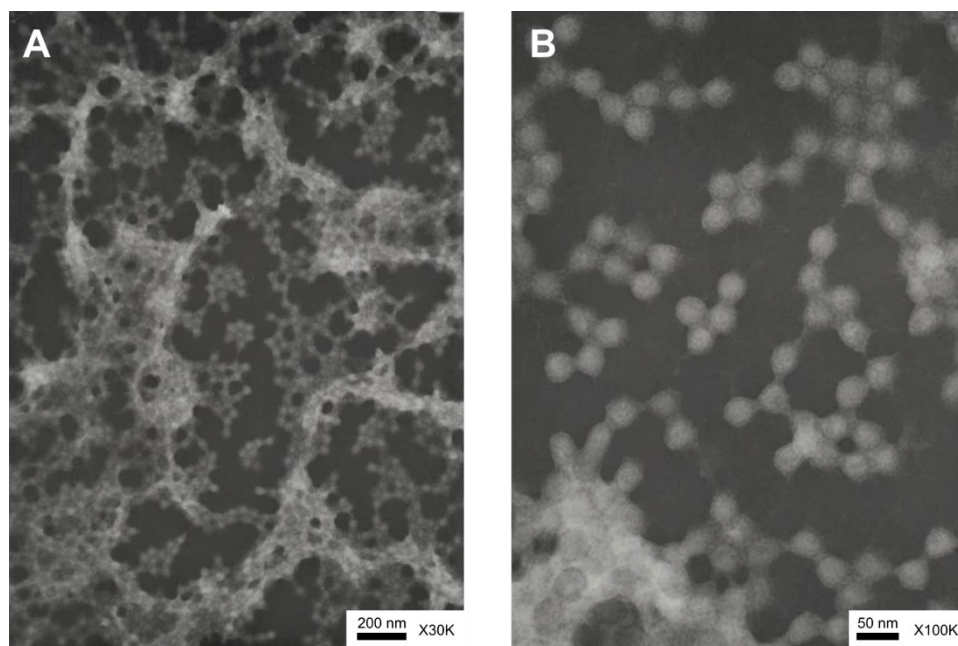

**Figure S3.** Images of HPV pseudoviral particles (PsV-HPV) produced in HEK293TT cells. Micrographs obtained using Transmission Electron Microscope at 30 000X magnification, scale bar = 50 nm (A) and 100 000X magnification, scale bar = 50 nm (B).
